# Supplementary material
Source: PubMed Central journal article supplement (PMC4411783)
Supplement: peds.2014-3738_peds.2014-3738SupplementaryData.pdf [file peds.2014-3738_peds.2014-3738SupplementaryData.pdf]

## Supplemental Information

**SUPPLEMENTAL TABLE 4** Proportion of Observations With Core Body Temperature <5th and >95th percentile for 16 Age and Temperature Subgroups

| Age Group   | Temperature Group (°C) | <i>n</i> | % <5th | <i>P</i>           | % >95th | <i>P</i>           |
|-------------|------------------------|----------|--------|--------------------|---------|--------------------|
| 0 to <6 mo  | <38                    | 798      | 2.3    | <.001 <sup>a</sup> | 6.1     | .1                 |
|             | ≥38                    | 374      | 2.1    | .008               | 10.4    | <.001 <sup>a</sup> |
| 6 to <12 mo | <38                    | 194      | 4.6    | .1                 | 4.6     | .1                 |
|             | ≥38                    | 173      | 3.5    | .5                 | 5.2     | .9                 |
| 1 to <3 y   | <38                    | 353      | 5.7    | .5                 | 6.5     | .2                 |
|             | ≥38                    | 229      | 3.5    | .4                 | 5.2     | .9                 |
| 3 to <5 y   | <38                    | 1219     | 3.6    | .03                | 6.0     | .1                 |
|             | ≥38                    | 206      | 4.4    | .9                 | 5.3     | .7                 |
| 5 to <7 y   | <38                    | 2624     | 5.0    | .9                 | 4.8     | .6                 |
|             | ≥38                    | 371      | 8.4    | .006               | 3.5     | .2                 |
| 7 to <9 y   | <38                    | 3475     | 5.0    | .97                | 4.7     | .5                 |
|             | ≥38                    | 376      | 5.1    | .9                 | 5.3     | .7                 |
| 9 to <11 y  | <38                    | 4255     | 4.4    | .09                | 6.9     | <.001 <sup>a</sup> |
|             | ≥38                    | 399      | 7.3    | .05                | 4.0     | .4                 |
| 11 to <14 y | <38                    | 8614     | 4.4    | .02                | 5.9     | <.001 <sup>a</sup> |
|             | ≥38                    | 598      | 5.0    | .9                 | 4.3     | .5                 |
| 14–18 y     | <38                    | 14 980   | 5.6    | <.001 <sup>a</sup> | 4.7     | .05                |
|             | ≥38                    | 858      | 3.7    | 0.1                | 5.8     | .3                 |

<sup>a</sup> Indicates statistical significance at level .0014 (.05 corrected for 36 comparisons).
